# Supplementary material
Source: publisher site journal article supplement (https://www.dovepress.com/article/376450)
Supplement: Supplementary file 1 [file get_supplementary_file.php]

# Annex I: Laboratory Data Extraction form

| **Residence** | **Code** | **Age** | **Sex** | **Result of Serum Protein Fractions** | | | | | | | | | | | | | |
| --- | --- | --- | --- | --- | --- | --- | --- | --- | --- | --- | --- | --- | --- | --- | --- | --- | --- |
| **Percentages (%)** | | | | | | | **Absolute Concentrations(g/dl)** | | | | | | |
| **ALB** | **α1** | **α2** | **β1** | **β2** | **Γ** | **A/G** | **ALB** | **α1** | **α2** | **β1** | **β2** | **γ** | **A/G** |
|  |  |  |  |  |  |  |  |  |  |  |  |  |  |  |  |  |  |
|  |  |  |  |  |  |  |  |  |  |  |  |  |  |  |  |  |  |
|  |  |  |  |  |  |  |  |  |  |  |  |  |  |  |  |  |  |
|  |  |  |  |  |  |  |  |  |  |  |  |  |  |  |  |  |  |
|  |  |  |  |  |  |  |  |  |  |  |  |  |  |  |  |  |  |
|  |  |  |  |  |  |  |  |  |  |  |  |  |  |  |  |  |  |
|  |  |  |  |  |  |  |  |  |  |  |  |  |  |  |  |  |  |
|  |  |  |  |  |  |  |  |  |  |  |  |  |  |  |  |  |  |
|  |  |  |  |  |  |  |  |  |  |  |  |  |  |  |  |  |  |
|  |  |  |  |  |  |  |  |  |  |  |  |  |  |  |  |  |  |
|  |  |  |  |  |  |  |  |  |  |  |  |  |  |  |  |  |  |
|  |  |  |  |  |  |  |  |  |  |  |  |  |  |  |  |  |  |
|  |  |  |  |  |  |  |  |  |  |  |  |  |  |  |  |  |  |
|  |  |  |  |  |  |  |  |  |  |  |  |  |  |  |  |  |  |
|  |  |  |  |  |  |  |  |  |  |  |  |  |  |  |  |  |  |
|  |  |  |  |  |  |  |  |  |  |  |  |  |  |  |  |  |  |
|  |  |  |  |  |  |  |  |  |  |  |  |  |  |  |  |  |  |
|  |  |  |  |  |  |  |  |  |  |  |  |  |  |  |  |  |  |
|  |  |  |  |  |  |  |  |  |  |  |  |  |  |  |  |  |  |
|  |  |  |  |  |  |  |  |  |  |  |  |  |  |  |  |  |  |
|  |  |  |  |  |  |  |  |  |  |  |  |  |  |  |  |  |  |
|  |  |  |  |  |  |  |  |  |  |  |  |  |  |  |  |  |  |
|  |  |  |  |  |  |  |  |  |  |  |  |  |  |  |  |  |  |
|  |  |  |  |  |  |  |  |  |  |  |  |  |  |  |  |  |  |
|  |  |  |  |  |  |  |  |  |  |  |  |  |  |  |  |  |  |
|  |  |  |  |  |  |  |  |  |  |  |  |  |  |  |  |  |  |
|  |  |  |  |  |  |  |  |  |  |  |  |  |  |  |  |  |  |
|  |  |  |  |  |  |  |  |  |  |  |  |  |  |  |  |  |  |

**Note:** **ALB=Albumin, α1=alpha-1 globulin, α2=alpha-2 globulin, β1=beta-1 globulin, β2=beta- 2 globulin, γ =globulin, A/G=Albumin to globulin ratio**

**Annex II: Standard operating procedure (SOP) for Capillary Electrophoresis**

1. **Sample Collection**

Blood samples were collected from the anti-cubital vein of the arm by using syringes after proper antisepsis with alcohol and sterile cotton swabs. Then the blood from each participant was transferred to serum separator tube and allowed to stand for 30 minutes. Serum was separated by centrifugation at 4000 rpm. All the medical equipment used for blood collections were safe and sterile.

**Procedure for serum separation**

1. 5 ml whole blood was drawn into serum separator tube containing no anticoagulant.
2. It was kept in upright position at room temperature for 30-45 min to allow clotting.
3. It was centrifuged for 5 min at manufacturer’s recommended speed 4000 rpm.
4. The serum was carefully aspirated at room temperature and pool into a centrifuge tube, taking care not to disturb the cell layer or transfer any cells. A clean pipette for each tube was used.
5. Serum was inspected for turbidity and hemolysis.
6. Aliquot into cryo-vials and stored at –80 °C. The cryo-vials were labeled with participant’s identification number.
7. **Serum Protein Capillary Electrophoresis**

**Clinical Utility**15**:**

The *capillarys 2 flex-piercing* protein (e) 6 kits is designed for the separation of human serum proteins in alkaline buffer (pH 9.9) by capillary Electrophoresis with the *capillarys 2 flex-piercing* System into six major fractions.

The *capillarys 2 flex-piercing* performs all sequences automatically to obtain a protein profile for qualitative or quantitative analysis. The proteins, separated in silica capillaries, are directly detected at an absorbance of 200 nm. The electro-phoregram(s) can be interpreted visually to screen for any pattern abnormalities. Direct detection provides accurate relative quantification of individual protein fractions.

**Principle of the test15**

The *capillarys 2 flex-piercing* System uses the principle of capillary electrophoresis in free solution. With this technique, charged molecules are separated by their electrophoretic mobility in an alkaline buffer with a specific pH. Separation also occurs according to the electrolyte pH and electro-osmotic flow.

The *capillarys 2 flex-piercing* System has 8 capillaries functioning in parallel allowing 8 simultaneous analyses. A sample dilution with buffer is prepared and injected by aspiration at the anodic end of the capillary. A high voltage protein separation is then performed and direct detection of the proteins is made at 200 nm at the cathodic end of the capillary. The capillaries are immediately washed with a Wash Solution and prepared for the next analysis with buffer.

Proteins are detected in the following order: gamma globulins, beta-2 globulins, beta-1 globulins, alpha-2 globulins, alpha-1 globulins and albumin with each zone containing one or more proteins.

**Reagents and materials supplied in the** *capillarys 2 flex-piercing* **protein (e) 6 kits**

1. **Buffer (ready to use):** contains buffer solution pH 9.9 ± 0.5, additives, nonhazardous at concentrations used, necessary for optimum performance of capillary electrophoresis in protein analysis.
2. **Wash Solution:** Useful for washing the capillaries after protein electrophoretic separation.
3. **Dilution Segments:** important for sample dilution on the automated instrument.
4. **Filters:** Useful for filtration of analysis buffer, working wash solution and distilled water (used for capillaries rinsing).

Reagents required but not supplied

1. **Distilled or deionized water:** Useful for capillaries rinsing in automated system *capillarys 2 flex-piercing*, SEBIA, for capillary electrophoresis.
2. **Capi-clean:** contains proteolytic enzymes, surfactants and additives nonhazardous at concentrations used, necessary for optimum performances. It is useful for sample probe cleaning in automated system *capillarys 2 flex-piercing*, SEBIA, for capillary electrophoresis, during the Capiclean cleaning sequence.
3. **Sodium hypochlorite solution (for sample probe cleaning):** Useful for the sample probe cleaning in the *capillarys 2 flex-piercing* System (weekly maintenance in order to eliminate adsorbed proteins from the probe).
4. *capillarys 2 flex-piercing* wash solution: Useful for additional washing of the capillaries of *capillarys 2 flex-piercing* when the number of tests by serie is below 40.

**Procedure:**

The *capillarys 2 flex-piercing* system is a multi-parameter instrument for serum proteins analysis on 8 parallel capillaries in the following sequence:

- 1. Bar code reading of sample tubes (for up to 8 tubes) and samples-racks
  2. Sample dilution from primary tubes into dilution segments
  3. Capillary washing
  4. Injection of diluted samples
  5. Migration under constant voltage, controlled by Peltier effect for about 4 minutes
  6. Detection of Serum Protein by directly scanning at 200 nm and an electrophoretic profile appears on the screen of the system.

**The manual steps include:**

1. Placement of sample tubes in sample-racks
2. Placement of racks on the *capillarys 2 flex-piercing* instrument
3. Removal of sample-racks after analysis.

**Note: Quality control serum is included with each sequence of protein analysis.**
